# Supplementary material
Source: PubMed Central journal article supplement (PMC7429283)
Supplement: NIHMS1603129-supplement-SI.pdf [file NIHMS1603129-supplement-SI.pdf]

## Supporting Information

### Optimization of high-throughput methyltransferase assays for the discovery of small molecule inhibitors

Guangping Dong<sup>†,‡,§</sup>, Adam Yasgar<sup>‡,§</sup>, Darrell L. Peterson<sup>#</sup>, Alexey Zakharov<sup>‡</sup>, Daniel Talley<sup>‡</sup>, Ken Chih-Chien Cheng<sup>‡</sup>, Ajit Jadhav<sup>‡</sup>, Anton Simeonov<sup>‡</sup>, Rong Huang<sup>†,‡,\*</sup>

<sup>†</sup> Department of Medicinal Chemistry and Molecular Pharmacology, Center for Cancer Research, Institute for Drug Discovery, Purdue University, West Lafayette, Indiana 47907, United States.

<sup>‡</sup> Department of Medicinal Chemistry, Institute for Structural Biology, Drug Discovery and Development, Virginia Commonwealth University, Richmond, Virginia 23219, United States.

<sup>‡</sup> National Center for Advancing Translational Sciences, National Institutes of Health, Rockville, Maryland 20892, United States.

<sup>#</sup> Department of Biochemistry, Institute for Structural Biology, Drug Discovery and Development, Virginia Commonwealth University, Richmond, Virginia 23219, United States.

<sup>§</sup> These authors contributed equally.

\* Correspondence should be addressed to R.H. (huang-r@purdue.edu)

### Table of Contents

|                                                                                                       |    |
|-------------------------------------------------------------------------------------------------------|----|
| Figure S1. $K_m$ of SPKRIA peptide substrate .....                                                    | S1 |
| Figure S2. AcRCC1-10 control titration.....                                                           | S2 |
| Figure S3. Reagent stability.....                                                                     | S3 |
| Figure S4. Example curves highlighting qHTS curve classification criteria.....                        | S4 |
| Figure S5. Positive curve classes from SAH mimetics in SAHH-ThioGlo3 and MTase-Glo assay formats..... | S5 |
| Figure S6. Three active hits identified in both SAHH-ThioGlo3 and MTase-Glo assays.....               | S6 |
| Figure S7. qHTS of LOPAC <sup>1280</sup> library. ....                                                | S7 |

A.

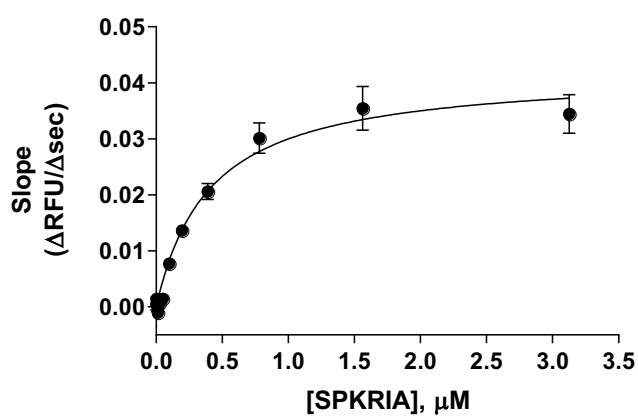

B.

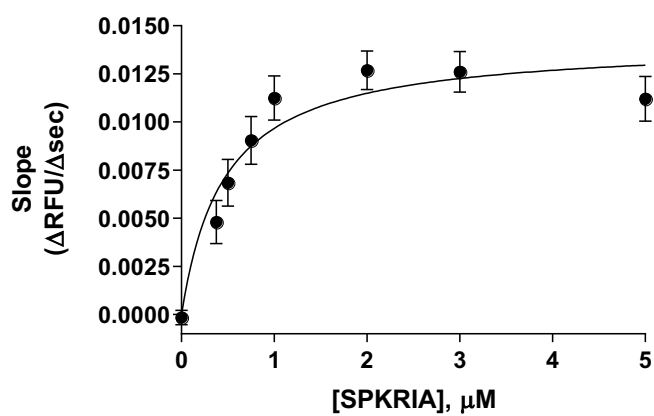

C.

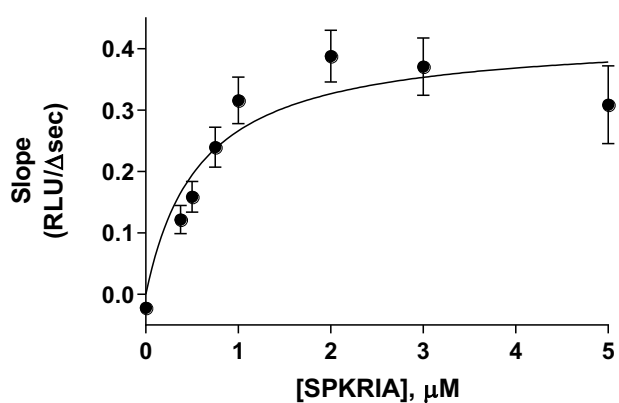

**Figure S1.**  $K_m$  determination for peptide substrate SPKRIA. A) 384-well plate format in SAHH-ThioGlo3 assay. B) 1536-well plate format in SAHH-ThioGlo3 assay. C) 1536-well plate format in MTase-Glo assay.

A.

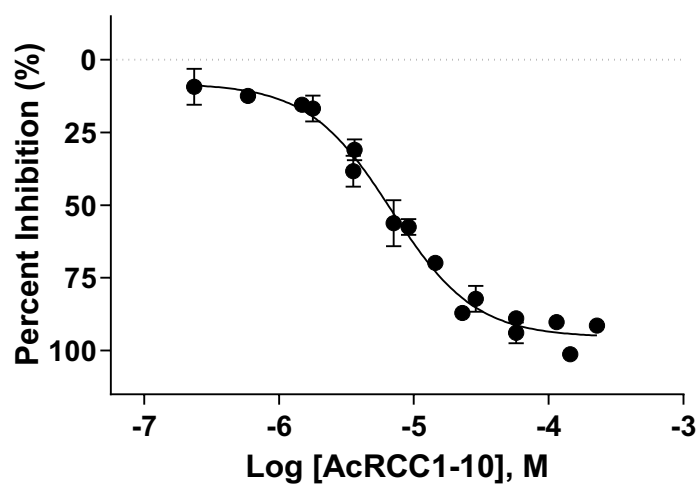

B.

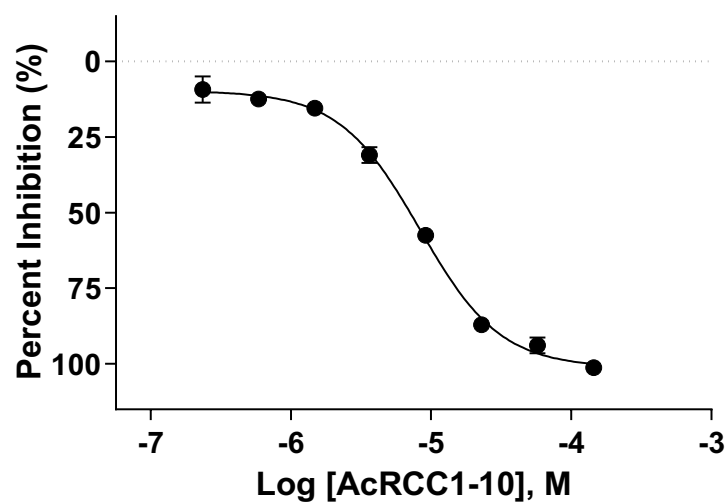

**Figure S2.** AcRCC1-10 control titration in 1536-well format (30 mins RT incubation). A) In SAHH-ThioGlo3 assay under the condition of 125 nM NTMT1, 1  $\mu$ M RCC1-6, 100  $\mu$ M SAM, 10  $\mu$ M SAHH, and 15  $\mu$ M ThioGlo3. B) In MTase-Glo assay (125 nM NTMT1, 1  $\mu$ M RCC1-6, 100  $\mu$ M SAM)

A.

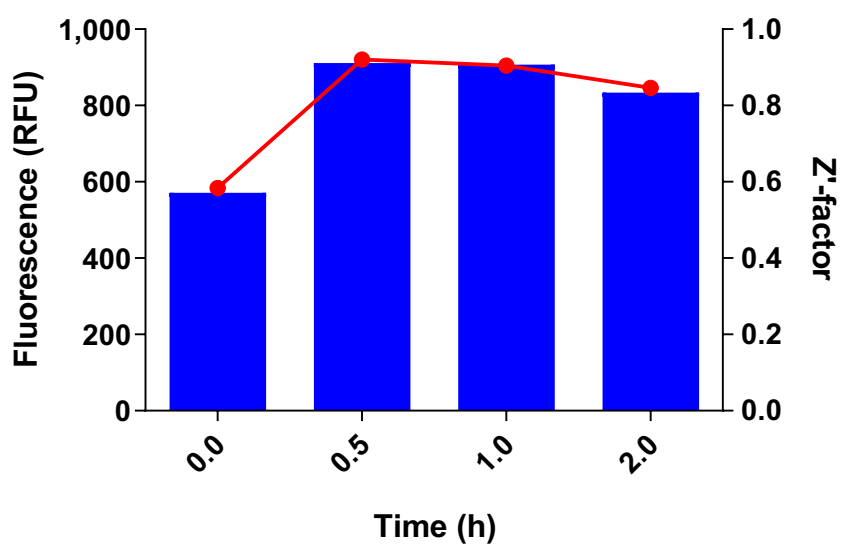

B.

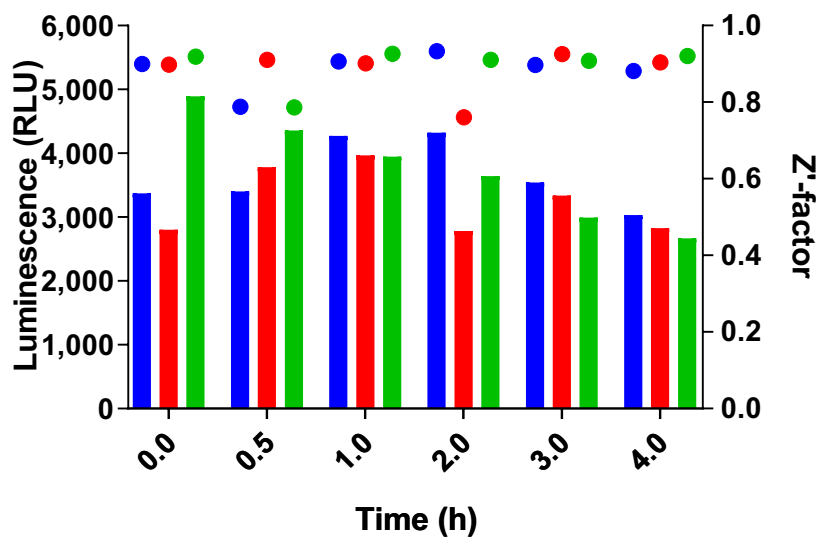

**Figure S3.** Reagent stability. A) Reagent stability (2h) of ThioGlo3 in 1536-well format. Blue bars are the fluorescent signal, red circles are Z'-factor value. B) Reagent stability (4h) of MTase-Glo in 1536-well format. Different color represents different day of preparation. Circle represents Z'-factor value.

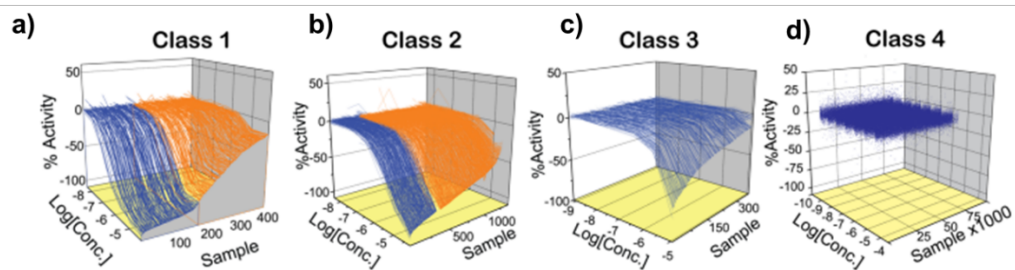

**Figure S4.** Example curves highlighting qHTS curve classification criteria. Lines connecting titration data corresponding to inhibitory compounds are shown. (a) Classes 1.1 (blue; >80% efficacy) and 1.2 (orange; ≤80% efficacy) inhibitors display full and partial activity, respectively, with  $r^2 \geq 0.9$ . (b) Incomplete curves for inhibitors having  $AC_{50}$  values within and beyond the tested titration range are Classes 2.1 (blue; >80% efficacy,  $r^2 > 0.9$ ) and 2.2 (orange; ≤80% efficacy,  $r^2 < 0.9$ ), respectively. (c) Incomplete inhibitory (blue) curves that show weak activity and poor fits are Class 3. (d) inactive compounds are Class 4.

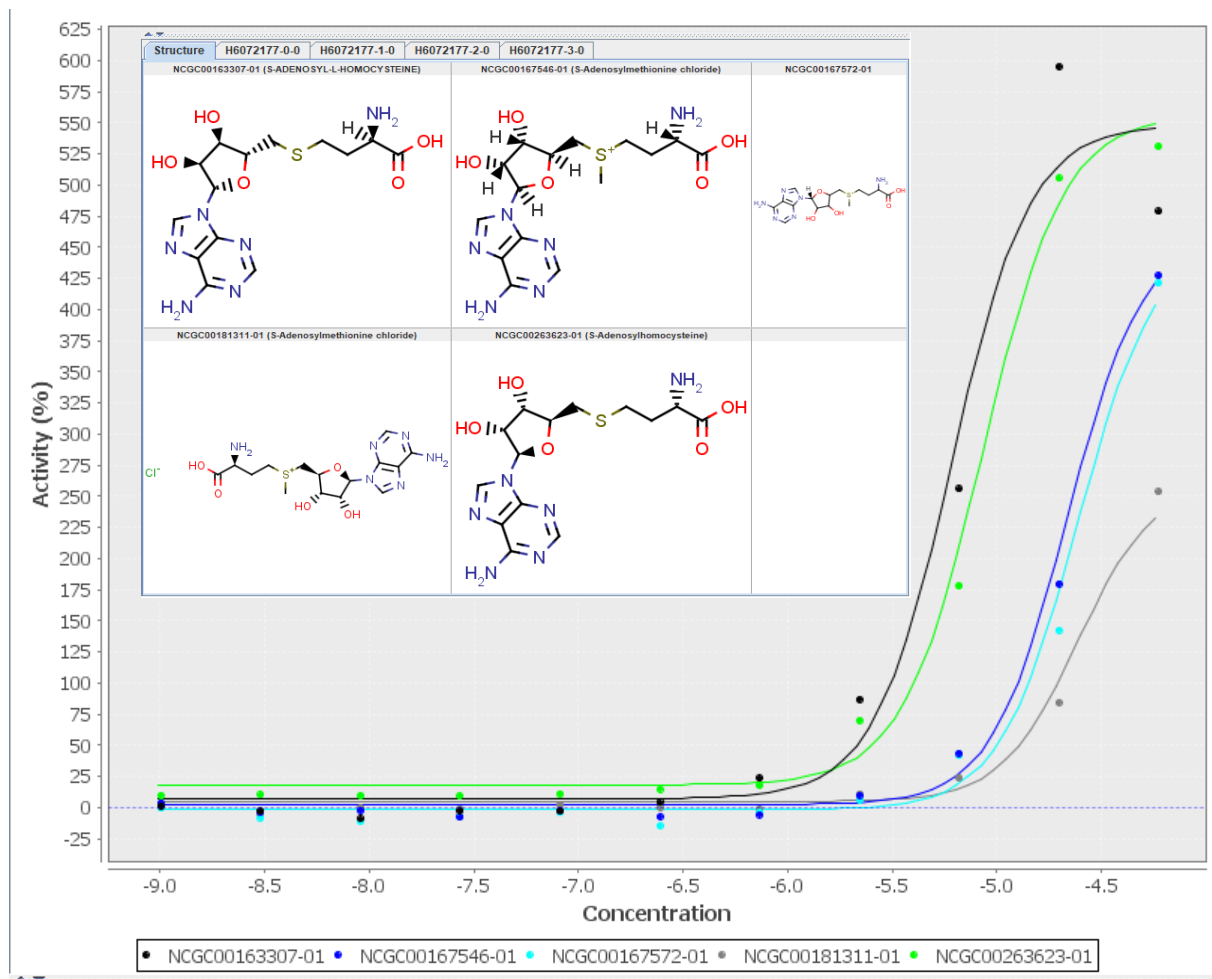

**Figure S5.** Positive curve classes from SAH mimetics in SAHH-ThioGlo3 and MTase-Glo assay formats.

A.

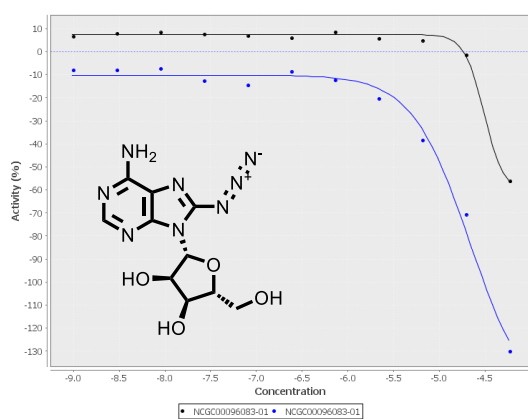

B.

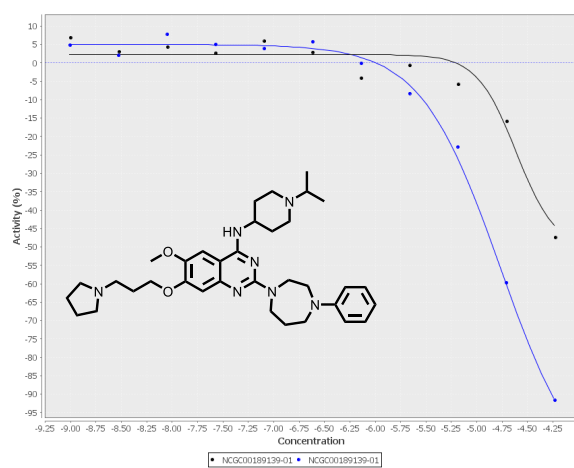

C.

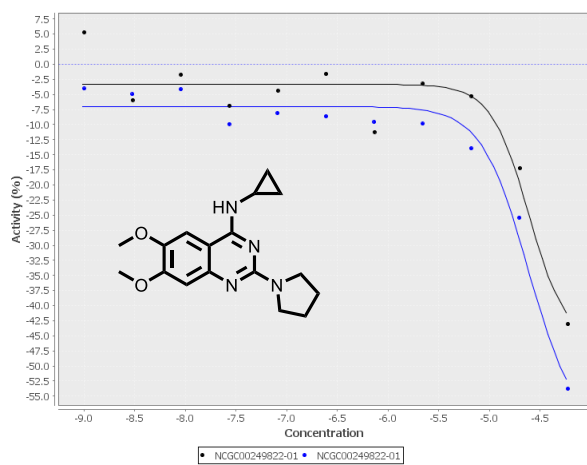

**Figure S6.** Three active hits identified in ThioGlo3 (blue line) and MTase-GLo (black line) assays. A) NCGC00096083 titrations. B) NCGC00189139 titrations. C) NCGC00249822 titrations.

A.

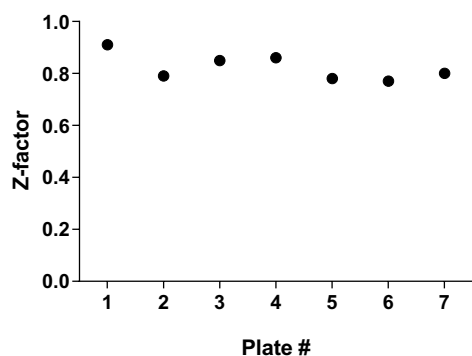

B.

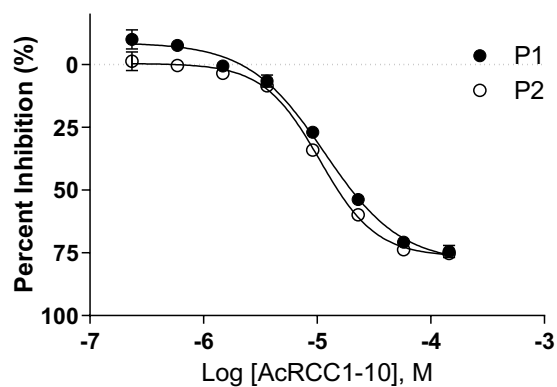

C.

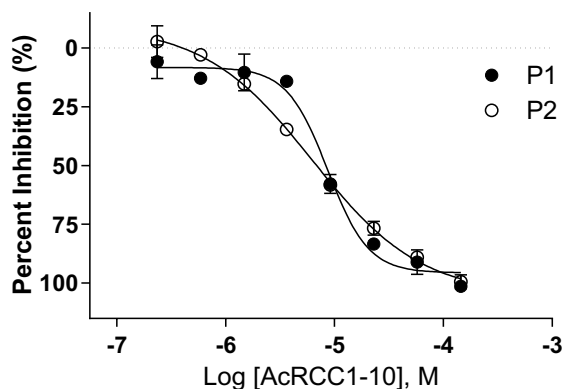

**Figure S7.** qHTS of LOPAC<sup>1280</sup> library. A) SAHH-ThioGlo3 assay performance. B) Intraplate control titration of AcRCC1-10 in SAHH-ThioGlo3 assay. C) MTase-Glo<sup>TM</sup> intraplate control titration of AcRCC1-10.
